# Supplementary material for: Bare Bones Pattern Formation: A Core Regulatory Network in Varying Geometries Reproduces Major Features of Vertebrate Limb Development and Evolution
Source: PubMed Central journal article supplement (PMC2878345; doi:10.1371/journal.pone.0010892), 2010-05-28
Supplement: pone.0010892.s005.pdf [file pone.0010892.s005.pdf]

**Zhu et al., Bare bones pattern formation: a core regulatory network in varying geometries reproduces major features of vertebrate limb development and evolution**

**File S5: Details of fossil simulations**

The full hypothetical developmental sequence for the ichthyosaur *Brachypterygius* is shown below, with the corresponding parameters. For the other fossil forms, the structures of which are shown in Fig. 7, only the parameters are given.

*Brachypterygius*

The final time is 2.55. Let  $x'(T)$  be the speed of the LALI zone and  $v$  be the speed of the frozen zone. We have the parameter values:

From  $T = 0$  to 1.5

$$\begin{cases} x'(T) = \sigma_x(x - vT) + v, \\ y'(T) = [y(0) - y_{lower}(0)] \frac{y'_{upper}(T) - y'_{lower}(T)}{y_{upper}(0) - y_{lower}(0)} + y'_{lower}(T), \\ \sigma_x = 0.4621, \quad v = 1.0. \end{cases}$$

From  $T = 1.5$  to 1.75

$$\begin{cases} x'(T) = \sigma_x(x - vT + 1.5) + v, \\ y'(T) = [y(0) - y_{lower}(0)] \frac{y'_{upper}(T) - y'_{lower}(T)}{y_{upper}(0) - y_{lower}(0)} + y'_{lower}(T), \\ \sigma_x = 0.4621, \quad v = 2.0. \end{cases}$$

From  $T = 1.75$  to 2.55

$$\begin{cases} x'(T) = \sigma_x(x - vT + 3.25) + v, \\ y'(T) = [y(0) - y_{lower}(0)] \frac{y'_{upper}(T) - y'_{lower}(T)}{y_{upper}(0) - y_{lower}(0)} + y'_{lower}(T), \\ \sigma_x = 0.4621, \quad v = 3.0. \end{cases}$$

$$\begin{cases} \gamma = 1500, \quad \delta = 4.7, \text{ from } T = 0 \text{ to } 1.5, \\ \gamma = 20000, \quad \delta = 4.7, \text{ from } T = 1.5 \text{ to } 1.75, \\ \gamma = 5000, \quad \delta = 4.7, \text{ from } T = 1.75 \text{ to } 2.55. \end{cases}$$

Since  $\sigma_x = 0.4621$  is positive, the LALI zone is not shrinking anymore.

The trajectory for upper ending point is

$$\left\{ \begin{array}{l} [x_{upper}(T), y_{upper}(T)] = [T, 1], \text{ from } T = 0 \text{ to } 0.5; \\ [x_{upper}(T), y_{upper}(T)] = [T, 0.1T^3 - 0.05T^2 - 0.025T + 1.0125], \text{ from } T = 0.5 \text{ to } 1.5; \\ [x_{upper}(T), y_{upper}(T)] = [2T - 1.5, -10.8(2T - 1.5)^3 + 56.2(2T - 1.5)^2 - 95.2(2T - 1.5) + 54], \\ \quad \text{from } T = 1.5 \text{ to } 1.75; \\ [x_{upper}(T), y_{upper}(T)] = [3T - 3.25, -0.0556(3T - 3.25)^3 + 0.4167(3T - 3.25)^2 - (3T - 3.25) + 2.7778], \\ \quad \text{from } T = 1.75 \text{ to } 2.55. \end{array} \right.$$

And the trajectory for lower ending point is

$$\left\{ \begin{array}{l} [x_{lower}(T), y_{lower}(T)] = [T, 0], \text{ from } T = 0 \text{ to } 0.5; \\ [x_{lower}(T), y_{lower}(T)] = [T, -0.1T^3 + 0.05T^2 + 0.025T - 0.0125], \text{ from } T = 0.5 \text{ to } 1.5; \\ [x_{lower}(T), y_{lower}(T)] = [2T - 1.5, 10.8(2T - 1.5)^3 - 56.2(2T - 1.5)^2 + 95.2(2T - 1.5) - 53], \\ \quad \text{from } T = 1.5 \text{ to } 1.75; \\ [x_{lower}(T), y_{lower}(T)] = [3T - 3.25, 0.0556(3T - 3.25)^3 - 0.4167(3T - 3.25)^2 + (3T - 3.25) - 1.7778], \\ \quad \text{from } T = 1.75 \text{ to } 2.55. \end{array} \right.$$

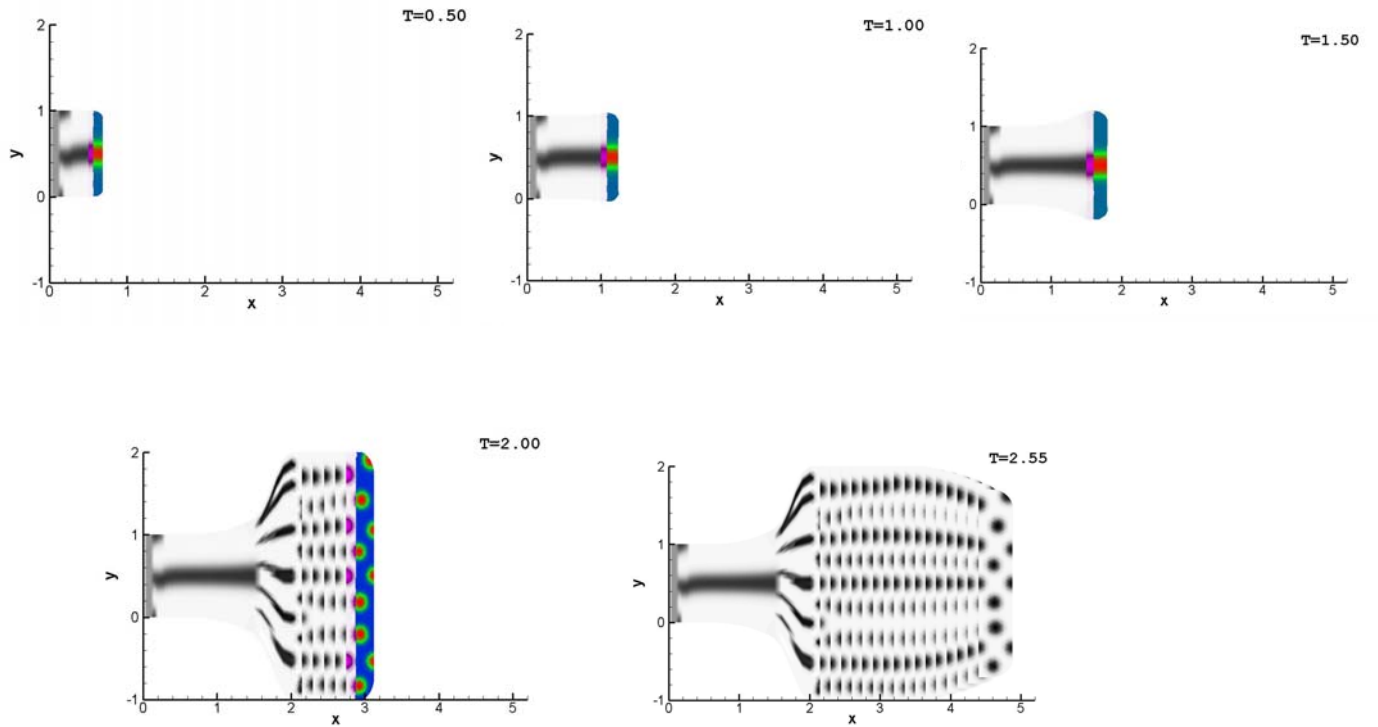

**Fig. S5.1** Simulation of hypothetical developmental sequence leading to the limb skeleton of the fossil form of the ichthyosaur *Brachypterygius*. Color legend: black/red/violet corresponds to 7.0, white/blue to 0.0, green corresponds to the median level 3.5.

### *Sauripterus*

The final time is  $T=3.50$

$$\begin{cases} x'(T) = \sigma_x(x - vT) + v, \\ y'(T) = [y(0) - y_{lower}(0)] \frac{y'_{upper}(T) - y'_{lower}(T)}{y_{upper}(0) - y_{lower}(0)} + y'_{lower}(T), \\ \sigma_x = -0.2027, \quad v = 1.0. \end{cases}$$

$$\begin{cases} \gamma = 1500, \quad \delta = 4.7, \text{ from } T = 0 \text{ to } 0.5, \\ \gamma = 1000, \quad \delta = 4.7, \text{ from } T = 0.5 \text{ to } 1.2, \\ \gamma = 1000, \quad \delta = 4.9, \text{ from } T = 1.2 \text{ to } 1.8, \\ \gamma = 3000, \quad \delta = 4.9, \text{ from } T = 1.8 \text{ to } 2.5, \\ \gamma = 10000, \quad \delta = 4.9, \text{ from } T = 2.5 \text{ to } 3.5. \end{cases}$$

The trajectory for upper ending point is

$$\begin{cases} [x_{upper}(T), y_{upper}(T)] = [T, 1], \text{ from } T = 0 \text{ to } 0.5, \\ [x_{upper}(T), y_{upper}(T)] = [T, -2.5T^3 + 7.25T^2 - 5.375T + 2.1875], \text{ from } T = 0.5 \text{ to } 1.5, \\ [x_{upper}(T), y_{upper}(T)] = [T, -1.5T^3 + 9.75T^2 - 19.625T + 14.5625], \text{ from } T = 1.5 \text{ to } 2.5, \\ [x_{upper}(T), y_{upper}(T)] = [T, 0.1481T^3 - 1.7778T^2 + 7.1111T - 5.9815], \text{ from } T = 2.5 \text{ to } 3.5. \end{cases}$$

The trajectory for lower ending point is

$$\begin{cases} [x_{lower}(T), y_{lower}(T)] = [T, 0], \text{ from } T = 0 \text{ to } 0.5, \\ [x_{lower}(T), y_{lower}(T)] = [T, 0.0233T^3 - 0.1574T^2 + 0.1399T - 0.0335], \text{ from } T = 0.5 \text{ to } 3.5. \end{cases}$$

The simulation result shown for *Sauripterus* in Fig. 7 is inverted vertically relative to the above.

## *Eusthenopteron*

The final time is  $T=5.00$

$$\begin{cases} x'(T) = \sigma_x(x - vT) + v, \\ y'(T) = [y(0) - y_{lower}(0)] \frac{y'_{upper}(T) - y'_{lower}(T)}{y_{upper}(0) - y_{lower}(0)} + y'_{lower}(T), \\ \sigma_x = -0.2027, \quad v = 1.0. \end{cases}$$
$$\begin{cases} \gamma = 1500, \quad \delta = 4.7, \text{ from } T = 0 \text{ to } 1.5, \\ \gamma = 5000, \quad \delta = 4.9, \text{ from } T = 1.5 \text{ to } 2.0, \\ \gamma = 4000, \quad \delta = 4.9, \text{ from } T = 2.0 \text{ to } 3.5, \\ \gamma = 1000, \quad \delta = 4.7, \text{ from } T = 3.5 \text{ to } 4.0, \\ \gamma = 5000, \quad \delta = 4.9, \text{ from } T = 4.0 \text{ to } 4.5, \\ \gamma = 17000, \quad \delta = 4.9, \text{ from } T = 4.5 \text{ to } 5.0. \end{cases}$$

The trajectory for upper ending point is

$$\begin{cases} [x_{upper}(T), y_{upper}(T)] = [T, 1], \text{ from } T = 0 \text{ to } 1.5, \\ [x_{upper}(T), y_{upper}(T)] = [T, -0.2T^3 + 1.5T^2 - 3.15T + 3.025], \text{ from } T = 1.5 \text{ to } 3.5, \\ [x_{upper}(T), y_{upper}(T)] = [T, 1.8], \text{ from } T = 3.5 \text{ to } 5.0. \end{cases}$$

The trajectory for lower ending point is

$$\begin{cases} [x_{lower}(T), y_{lower}(T)] = [T, 0], \text{ from } T = 0 \text{ to } 1.5, \\ [x_{lower}(T), y_{lower}(T)] = [T, T^3 - 6T^2 + 11.25T - 6.75], \text{ from } T = 1.5 \text{ to } 2.5, \\ [x_{lower}(T), y_{lower}(T)] = [T, -0.5], \text{ from } T = 2.5 \text{ to } 3.0, \\ [x_{lower}(T), y_{lower}(T)] = [T, -2.6T^3 + 27.3T^2 - 93.6T + 104.8], \text{ from } T = 3.0 \text{ to } 4.0, \\ [x_{lower}(T), y_{lower}(T)] = [T, 0.8], \text{ from } T = 4.0 \text{ to } 5.0. \end{cases}$$

The simulation result shown for *Eusthenopteron* in Fig. 7 is inverted vertically relative to the above.

## *Panderichthys*

The final time is  $T=4.00$

$$\begin{cases} x'(T) = \sigma_x(x - vT) + v, \\ y'(T) = [y(0) - y_{lower}(0)] \frac{y'_{upper}(T) - y'_{lower}(T)}{y_{upper}(0) - y_{lower}(0)} + y'_{lower}(T), \\ \sigma_x = -0.2027, \quad v = 1.0. \end{cases}$$
$$\begin{cases} \gamma = 1500, \quad \delta = 4.7, \text{ from } T = 0 \text{ to } 1.0, \\ \gamma = 1000, \quad \delta = 4.7, \text{ from } T = 1.0 \text{ to } 2.3, \\ \gamma = 3000, \quad \delta = 4.9, \text{ from } T = 2.3 \text{ to } 3.0, \\ \gamma = 9000, \quad \delta = 4.9, \text{ from } T = 3.0 \text{ to } 3.5, \\ \gamma = 18000, \quad \delta = 4.9, \text{ from } T = 3.5 \text{ to } 4.0. \end{cases}$$

The trajectory for upper ending point is

$$\begin{cases} [x_{upper}(T), y_{upper}(T)] = [T, 1], \text{ from } T = 0 \text{ to } 1.0, \\ [x_{upper}(T), y_{upper}(T)] = [T, -1.6T^3 + 7.2T^2 - 9.6T + 5], \text{ from } T = 1.0 \text{ to } 2.0, \\ [x_{upper}(T), y_{upper}(T)] = [T, 44.4444T^3 - 286.6667T^2 + 613.3333T - 433.7556], \text{ from } T = 2.0 \text{ to } 2.3, \\ [x_{upper}(T), y_{upper}(T)] = [T, -0.1628T^3 + 1.5388T^2 - 4.4942T + 5.3777], \text{ from } T = 2.3 \text{ to } 4.0. \end{cases}$$

The trajectory for lower ending point is

$$\begin{cases} [x_{lower}(T), y_{lower}(T)] = [T, 0], \text{ from } T = 0 \text{ to } 3.0, \\ [x_{lower}(T), y_{lower}(T)] = [T, -0.1T^3 + 1.3T^2 - 5.1T + 6.3], \text{ from } T = 3.0 \text{ to } 4.0. \end{cases}$$

The simulation result shown for *Panderichthys* in Fig. 7 is inverted vertically relative to the above.

*Tiktaalik*

The final time is  $T=5.50$

$$\begin{cases} x'(T) = \sigma_x(x - vT) + v, \\ y'(T) = [y(0) - y_{lower}(0)] \frac{y'_{upper}(T) - y'_{lower}(T)}{y_{upper}(0) - y_{lower}(0)} + y'_{lower}(T), \\ \sigma_x = -0.2027, \quad v = 1.0. \end{cases}$$

$$\begin{cases} \gamma = 1500, \quad \delta = 4.7, \text{ from } T = 0 \text{ to } 0.5, \\ \gamma = 1000, \quad \delta = 4.7, \text{ from } T = 0.5 \text{ to } 2.0, \\ \gamma = 1500, \quad \delta = 4.9, \text{ from } T = 2.0 \text{ to } 3.5, \\ \gamma = 2700, \quad \delta = 4.9, \text{ from } T = 3.5 \text{ to } 4.5, \\ \gamma = 10000, \quad \delta = 4.9, \text{ from } T = 4.5 \text{ to } 5.0, \\ \gamma = 3000, \quad \delta = 4.9, \text{ from } T = 5.0 \text{ to } 5.5. \end{cases}$$

The trajectory for upper ending point is

$$\begin{cases} [x_{upper}(T), y_{upper}(T)] = [T, 1], \text{ from } T = 0 \text{ to } 1.5, \\ [x_{upper}(T), y_{upper}(T)] = [T, -T^3 + 6T^2 - 11.25T + 7.75], \text{ from } T = 1.5 \text{ to } 2.5, \\ [x_{upper}(T), y_{upper}(T)] = [T, 1.5], \text{ from } T = 2.5 \text{ to } 4.5, \\ [x_{upper}(T), y_{upper}(T)] = [T, -0.5T^2 + 4.5T - 8.625], \text{ from } T = 4.5 \text{ to } 5.5. \end{cases}$$

The trajectory for lower ending point is

$$\begin{cases} [x_{lower}(T), y_{lower}(T)] = [T, 0], \text{ from } T = 0 \text{ to } 0.5, \\ [x_{lower}(T), y_{lower}(T)] = [T, 0.0741T^3 - 0.4444T^2 + 0.3889T - 0.0926], \text{ from } T = 0.5 \text{ to } 3.5, \\ [x_{lower}(T), y_{lower}(T)] = [T, 0.25T^2 - 1.75T + 2.0625], \text{ from } T = 3.5 \text{ to } 5.5. \end{cases}$$

The simulation result shown for *Tiktaalik* in Fig. 7 is inverted vertically relative to the above.
